# Supplementary material
Source: PubMed Central journal article supplement (PMC4249574)
Supplement: AAC.03475-14_zac012143485so1.pdf [file AAC.03475-14_zac012143485so1.pdf]

## A Novel High-Throughput Cell Based Assay Aimed at Identifying Inhibitors of DNA Metabolism in Bacteria

Jun Fan<sup>a</sup>, Boudewijn L.M. de Jonge<sup>a</sup>, Kathy MacCormack<sup>a</sup>, Shubha Sriram<sup>a</sup>, Robert E. McLaughlin<sup>a</sup>, Helen Plant<sup>b</sup>, Marian Preston<sup>b</sup>, Paul R. Fleming<sup>c</sup>, Robert Albert<sup>c</sup>, Melinda Foulk<sup>c</sup>, and Scott D. Mills<sup>a#</sup>

Infection Bioscience, AstraZeneca R&D Boston, Waltham, MA, USA<sup>a</sup>; Discovery Sciences, AstraZeneca, Mereside, Alderley Park, Macclesfield, Cheshire, United Kingdom<sup>b</sup>; Infection Chemistry, AstraZeneca R&D Boston, Waltham, MA, USA<sup>c</sup>

#Address correspondence to Scott D. Mills, [scott.mills@astrazeneca.com](mailto:scott.mills@astrazeneca.com)

Running title: HTS screen for DNA metabolism Inhibitors

**TABLE S1** Approximately 100 essential *E. coli* genes linked to DNA metabolism, that are potential antibacterial targets for SOS biosensor assay.

| Gene name   | Alias       | Swiss-Prot ID and Functional Description |                                                                                              | Functional category <sup>1</sup> |
|-------------|-------------|------------------------------------------|----------------------------------------------------------------------------------------------|----------------------------------|
|             | Blattner ID | SP_ID                                    | Function                                                                                     |                                  |
| <i>aceF</i> | b0115       | P06959                                   | Dihydrolipoamide acetyltransferase component of pyruvate dehydrogenase complex (EC 2.3.1.12) | NCM                              |
| <i>acpS</i> | b2563       | P24224                                   | Holo-[acyl-carrier protein] synthase (EC 2.7.8.7)                                            | NCM                              |
| <i>allA</i> | b0505       | P77731                                   | Ureidoglycolate hydrolase (EC 3.5.3.19)                                                      | NCM                              |
| <i>apt</i>  | b0469       | P07672                                   | Adenine phosphoribosyltransferase (EC 2.4.2.7)                                               | NCM                              |
| <i>birA</i> | b3973       | P06709                                   | BirA bifunctional protein                                                                    | NCM                              |
| <i>btuR</i> | b1270       | P13040                                   | COB(l)alamin adenosyltransferase (EC 2.5.1.17)                                               | NCM                              |
| <i>cca</i>  | b3056       | P06961                                   | tRNA nucleotidyltransferase (EC 2.7.7.25)                                                    | NAM                              |
| <i>cmk</i>  | b0910       | P23863                                   | Cytidylate kinase (EC 2.7.4.14)                                                              | NCM                              |
| <i>coaA</i> | b3974       | P15044                                   | Pantothenate kinase (EC 2.7.1.33)                                                            | NCM                              |
| <i>coaD</i> | b3634       | P23875                                   | Phosphopantetheine adenylyltransferase (EC 2.7.7.3)                                          | NCM                              |
| <i>coaE</i> | b0103       | P36679                                   | Dephospho-CoA kinase (EC 2.7.1.24)                                                           | NCM                              |
| <i>dcm</i>  | b1961       | P11876                                   | DNA-cytosine methyltransferase (EC 2.1.1.73)                                                 | NAM                              |
| <i>dfp</i>  | b3639       | P24285                                   | DNA/pantothenate metabolism flavoprotein                                                     | NCM                              |
| <i>dnaA</i> | b3702       | P03004                                   | Chromosomal replication initiator protein dnaA                                               | NAM                              |
| <i>dnaB</i> | b4052       | P03005                                   | Replicative DNA helicase (EC 3.6.1.-)                                                        | NAM                              |
| <i>dnaC</i> | b4361       | P07905                                   | DNA replication protein dnaC                                                                 | NAM                              |
| <i>dnaE</i> | b0184       | P10443                                   | DNA polymerase III alpha subunit (EC 2.7.7.7)                                                | NAM                              |
| <i>dnaG</i> | b3066       | P02923                                   | DNA primase (EC 2.7.7.-)                                                                     | NAM                              |
| <i>dnaQ</i> | b0215       | P03007                                   | DNA polymerase III, epsilon chain (EC 2.7.7.7)                                               | NAM                              |
| <i>dnaT</i> | b4362       | P07904                                   | Primosomal protein I                                                                         | NAM                              |
| <i>dnaX</i> | b0470       | P06710                                   | DNA polymerase III subunit tau (EC 2.7.7.7)                                                  | NAM                              |
| <i>dut</i>  | b3640       | P06968                                   | Deoxyuridine 5'-triphosphate nucleotidohydrolase (EC 3.6.1.23)                               | NCM                              |
| <i>dxs</i>  | b0420       | P77488                                   | 1-deoxy-D-xylulose 5-phosphate synthase (EC 4.1.3.37)                                        | NCM                              |
| <i>fmt</i>  | b3288       | P23882                                   | Methionyl-tRNA formyltransferase (EC 2.1.2.9)                                                | NAM                              |
| <i>folA</i> | b0048       | P00379                                   | Dihydrofolate reductase (EC 1.5.1.3)                                                         | NCM                              |
| <i>folE</i> | b2153       | P27511                                   | GTP cyclohydrolase I (EC 3.5.4.16)                                                           | NCM                              |
| <i>folk</i> | b0142       | P26281                                   | 2-amino-4-hydroxy-6-hydroxymethyl-dihydropteridine pyrophosphokinase (EC 2.7.6.3)            | NCM                              |
| <i>gmk</i>  | b3648       | P24234                                   | Guanylate kinase (EC 2.7.4.8)                                                                | NCM                              |
| <i>gyrA</i> | b2231       | P09097                                   | DNA gyrase subunit A (EC 5.99.1.3)                                                           | NAM                              |
| <i>hemB</i> | b0369       | P15002                                   | Delta-aminolevulinic acid dehydratase (EC 4.2.1.24)                                          | NCM                              |
| <i>hemC</i> | b3805       | P06983                                   | Porphobilinogen deaminase (EC 4.3.1.8)                                                       | NCM                              |
| <i>hemD</i> | b3804       | P09126                                   | Uroporphyrinogen-III synthase (EC 4.2.1.75)                                                  | NCM                              |
| <i>hemE</i> | b3997       | P29680                                   | Uroporphyrinogen decarboxylase (EC 4.1.1.37)                                                 | NCM                              |
| <i>hemG</i> | b3850       | P27863                                   | Protoporphyrinogen oxidase (EC 1.3.3.4)                                                      | NCM                              |
| <i>hemH</i> | b0475       | P23871                                   | Ferrochelatase (EC 4.99.1.1)                                                                 | NCM                              |
| <i>hemK</i> | b1212       | P37186                                   | Protein methyltransferase hemK (EC 2.1.1.-)                                                  | NCM                              |
| <i>hemL</i> | b0154       | P23893                                   | Glutamate-1-semialdehyde 2,1-aminomutase (EC 5.4.3.8)                                        | NCM                              |
| <i>holA</i> | b0640       | P28630                                   | DNA polymerase III, delta subunit (EC 2.7.7.7)                                               | NAM                              |
| <i>holB</i> | b1099       | P28631                                   | DNA polymerase III, delta' subunit (EC 2.7.7.7)                                              | NAM                              |
| <i>holC</i> | b4259       | P28905                                   | DNA polymerase III, chi subunit (EC 2.7.7.7)                                                 | NAM                              |
| <i>iscS</i> | b2530       | P39171                                   | Cysteine desulfurase (EC 4.4.1.-)                                                            | NCM                              |
| <i>ligA</i> | b2411       | P15042                                   | DNA ligase (EC 6.5.1.2)                                                                      | NAM                              |
| <i>lplA</i> | b4386       | P32099                                   | Lipoate-protein ligase A (EC 6.-.-)                                                          | NCM                              |
| <i>menE</i> | b2260       | P37353                                   | O-succinylbenzoic acid--CoA ligase (EC 6.2.1.26)                                             | NCM                              |

|             |       |        |                                                                            |     |
|-------------|-------|--------|----------------------------------------------------------------------------|-----|
| <i>miaA</i> | b4171 | P16384 | tRNA delta(2)-isopentenylpyrophosphate transferase (EC 2.5.1.8)            | NAM |
| <i>mog</i>  | b0009 | P28694 | Molybdopterin biosynthesis mog protein                                     | NCM |
| <i>nadE</i> | b1740 | P18843 | NH(3)-dependent NAD(+) synthetase (EC 6.3.5.1)                             | NCM |
| <i>nrdA</i> | b2234 | P00452 | Ribonucleoside-diphosphate reductase 1 alpha chain (EC 1.17.4.1)           | NCM |
| <i>nrdB</i> | b2235 | P00453 | Ribonucleoside-diphosphate reductase 1 beta chain (EC 1.17.4.1)            | NCM |
| <i>nudB</i> | b1865 | P24236 | dATP pyrophosphohydrolase (EC 3.6.1.-)                                     | NCM |
| <i>parC</i> | b3019 | P20082 | Topoisomerase IV subunit A (EC 5.99.1.-)                                   | NAM |
| <i>parE</i> | b3030 | P20083 | Topoisomerase IV subunit B (EC 5.99.1.-)                                   | NAM |
| <i>pdxJ</i> | b2564 | P24223 | Pyridoxal phosphate biosynthetic protein pdxJ                              | NCM |
| <i>phrB</i> | b0708 | P00914 | Deoxyribodipyrimidine photolyase (EC 4.1.99.3)                             | NAM |
| <i>plsC</i> | b3018 | P26647 | 1-acyl-sn-glycerol-3-phosphate acyltransferase (EC 2.3.1.51)               | NAM |
| <i>pnp</i>  | b3164 | P05055 | Polyribonucleotide nucleotidyltransferase (EC 2.7.7.8)                     | NAM |
| <i>priA</i> | b3935 | P17888 | Primosomal protein N'                                                      | NAM |
| <i>priB</i> | b4201 | P07013 | Primosomal replication protein N                                           | NAM |
| <i>priC</i> | b0467 | P23862 | Primosomal replication protein N"                                          | NAM |
| <i>pth</i>  | b1204 | P23932 | Peptidyl-tRNA hydrolase (EC 3.1.1.29)                                      | NAM |
| <i>purU</i> | b1232 | P37051 | Formyltetrahydrofolate deformylase (EC 3.5.1.10)                           | NCM |
| <i>pyrF</i> | b1281 | P08244 | Orotidine 5'-phosphate decarboxylase (EC 4.1.1.23)                         | NCM |
| <i>pyrG</i> | b2780 | P08398 | CTP synthase (EC 6.3.4.2)                                                  | NCM |
| <i>pyrH</i> | b0171 | P29464 | Uridylate kinase (EC 2.7.4.-)                                              | NCM |
| <i>rep</i>  | b3778 | P09980 | ATP-dependent DNA helicase rep (EC 3.6.1.-)                                | NAM |
| <i>ribA</i> | b1277 | P25523 | GTP cyclohydrolase II (EC 3.5.4.25)                                        | NCM |
| <i>ribB</i> | b3041 | P24199 | 3,4-dihydroxy-2-butanone 4-phosphate synthase                              | NCM |
| <i>ribD</i> | b0414 | P25539 | Riboflavin biosynthesis protein ribD                                       | NCM |
| <i>ribE</i> | b1662 | P29015 | Riboflavin synthase alpha chain (EC 2.5.1.9)                               | NCM |
| <i>ribF</i> | b0025 | P08391 | Riboflavin biosynthesis protein ribF                                       | NCM |
| <i>ribH</i> | b0415 | P25540 | 6,7-dimethyl-8-ribityllumazine synthase (EC 2.5.1.9)                       | NCM |
| <i>rimM</i> | b2608 | P21504 | 16S rRNA processing protein rimM                                           | NAM |
| <i>rluA</i> | b0058 | P39219 | Ribosomal large subunit pseudouridine synthase A (EC 4.2.1.70)             | NAM |
| <i>rluD</i> | b2594 | P33643 | Ribosomal large subunit pseudouridine synthase D (EC 4.2.1.70)             | NAM |
| <i>rnc</i>  | b2567 | P05797 | Ribonuclease III (EC 3.1.26.3)                                             | NAM |
| <i>rne</i>  | b1084 | P21513 | Ribonuclease E (EC 3.1.4.-)                                                | NAM |
| <i>rnhA</i> | b0214 | P00647 | Ribonuclease HI (EC 3.1.26.4)                                              | NAM |
| <i>rnhB</i> | b0183 | P10442 | Ribonuclease HII (EC 3.1.26.4)                                             | NAM |
| <i>rnt</i>  | b1652 | P30014 | Ribonuclease T (EC 3.1.13.-)                                               | NAM |
| <i>rpoB</i> | b3987 | P00575 | DNA-directed RNA polymerase beta chain (EC 2.7.7.6)                        | NAM |
| <i>rpoC</i> | b3988 | P00577 | DNA-directed RNA polymerase beta' chain (EC 2.7.7.6)                       | NAM |
| <i>rusA</i> | b0550 | P40116 | Crossover junction endodeoxyribonuclease rusA (EC 3.1.22.-)                | NAM |
| <i>ruvC</i> | b1863 | P24239 | Crossover junction endodeoxyribonuclease ruvC (EC 3.1.22.4)                | NAM |
| <i>tdk</i>  | b1238 | P23331 | Thymidine kinase (EC 2.7.1.21)                                             | NCM |
| <i>thiL</i> | b0417 | P77785 | Thiamine-monophosphate kinase (EC 2.7.4.16)                                | NCM |
| <i>thyA</i> | b2827 | P00470 | Thymidylate synthase (EC 2.1.1.45)                                         | NCM |
| <i>tmk</i>  | b1098 | P37345 | Thymidylate kinase (EC 2.7.4.9)                                            | NCM |
| <i>topA</i> | b1274 | P06612 | DNA topoisomerase I (EC 5.99.1.2)                                          | NAM |
| <i>trmD</i> | b2607 | P07020 | tRNA (Guanine-N(1)-)-methyltransferase (EC 2.1.1.31)                       | NAM |
| <i>trmU</i> | b1133 | P25745 | tRNA (5-methylaminomethyl-2-thiouridylate)-methyltransferase (EC 2.1.1.61) | NAM |
| <i>tus</i>  | b1610 | P16525 | DNA replication terminus site-binding protein                              | NAM |

|             |       |        |                                                                                |     |
|-------------|-------|--------|--------------------------------------------------------------------------------|-----|
| <i>ubiE</i> | b3833 | P27851 | Ubiquinone/menaquinone biosynthesis methyltransferase <i>ubiE</i> (EC 2.1.1.-) | NCM |
| <i>ubiG</i> | b2232 | P17993 | 3-demethylubiquinone-9 3-methyltransferase (EC 2.1.1.64)                       | NCM |
| <i>ubiH</i> | b2907 | P25534 | 2-octaprenyl-6-methoxyphenol hydroxylase (EC 1.14.13.-)                        | NCM |
| <i>ubiX</i> | b2311 | P09550 | 3-octaprenyl-4-hydroxybenzoate carboxy-lyase (EC 4.1.1.-)                      | NCM |
| <i>uppS</i> | b0174 | Q47675 | Undecaprenyl pyrophosphate synthetase (EC 2.5.1.31)                            | NCM |
| <i>xerC</i> | b3811 | P22885 | Integrase/recombinase <i>xerC</i>                                              | NAM |

<sup>1</sup>NAM, Nucleic acid metabolism; NCM, Nucleotide and Cofactor Metabolism
